# Supplementary material for: Comparison of equatorial wave activity in the tropical tropopauselayer and stratosphere represented in reanalyses
Source: Copernicus journal article supplement (doi:10.5194/acp-2019-110), 2019-02-20
Supplement: Supplementary file [file acp-2019-110-AC1-supplement.pdf]

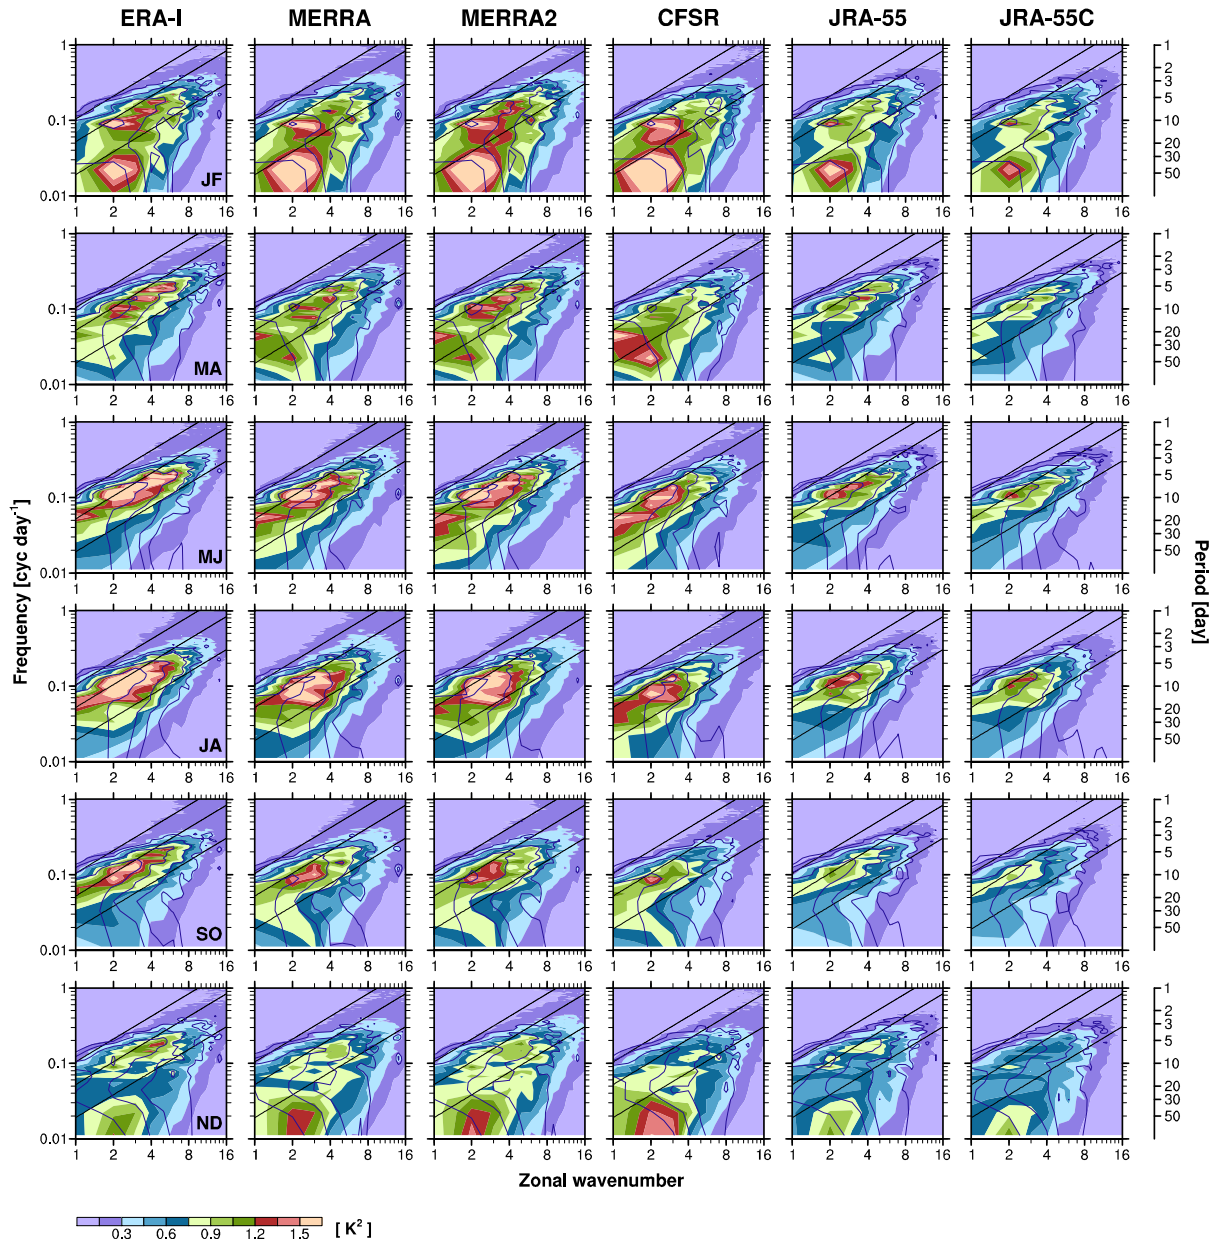

**Figure A1.** The same as in Fig. 1 except for the 100-hPa spectra in different months: January–February, March–April, May–June, July–August, September–October, and November–December (JF, MA, MJ, JA, SO, and ND, respectively, from top to bottom).

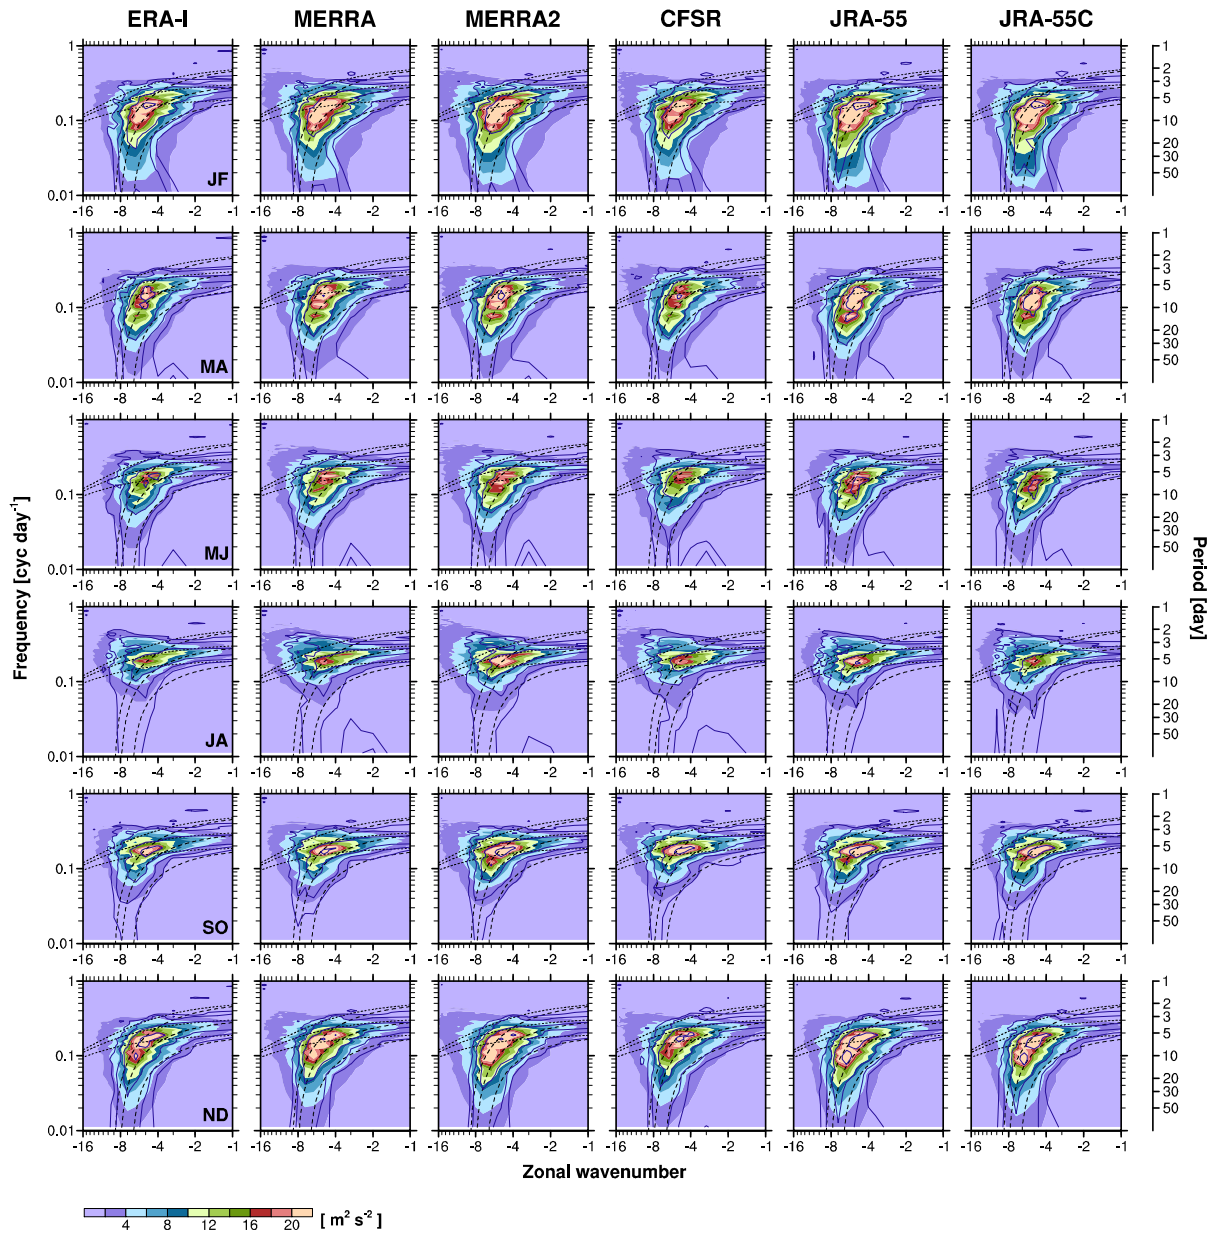

**Figure A2.** The same as in Fig. A1 except for the spectra of the symmetric component of meridional wind. The dotted and dashed curves are the same as in Fig. 2.

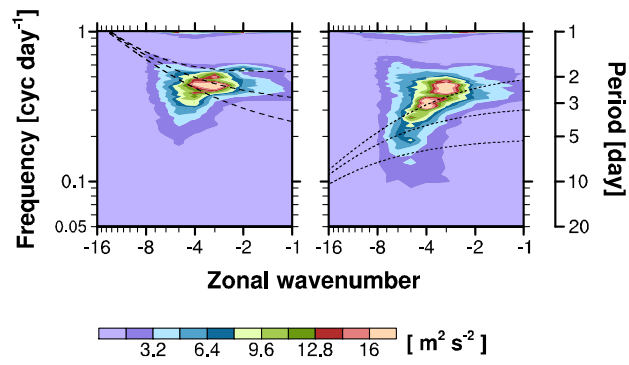

**Figure A3.** The same as in Fig. 14 except for the spectra at 7 hPa. The composites are based on the 20-hPa zonal wind as in Fig. 14.
